# Supplementary material for: Transcriptional profiling of the Arabidopsis abscission mutant hae hsl2 by RNA-Seq
Source: PubMed Central journal article supplement (PMC3566969; doi:10.1186/1471-2164-14-37), 2013-01-17
Supplement: 1471-2164-14-37-S1.pdf [file 1471-2164-14-37-S1.pdf]

**A**

**Flower Stage**

**12**

**13**

**14**

**15**

**16**

**17**

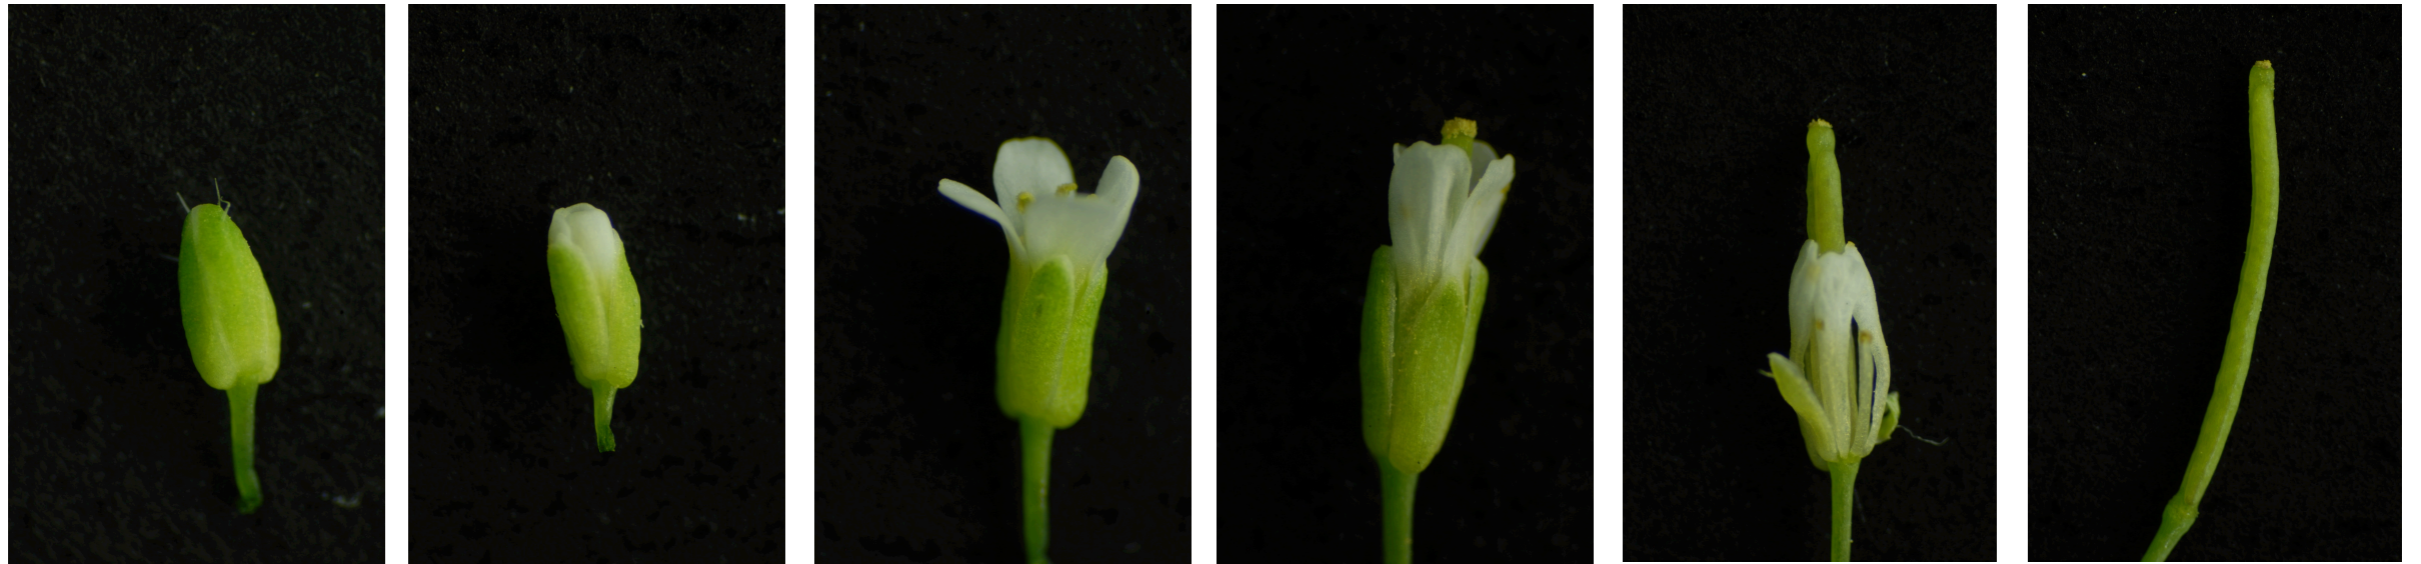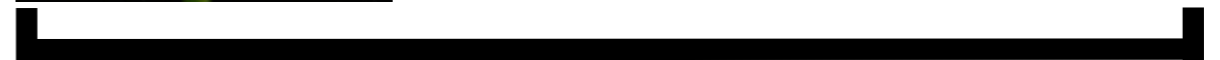

**Abscission**

**B**

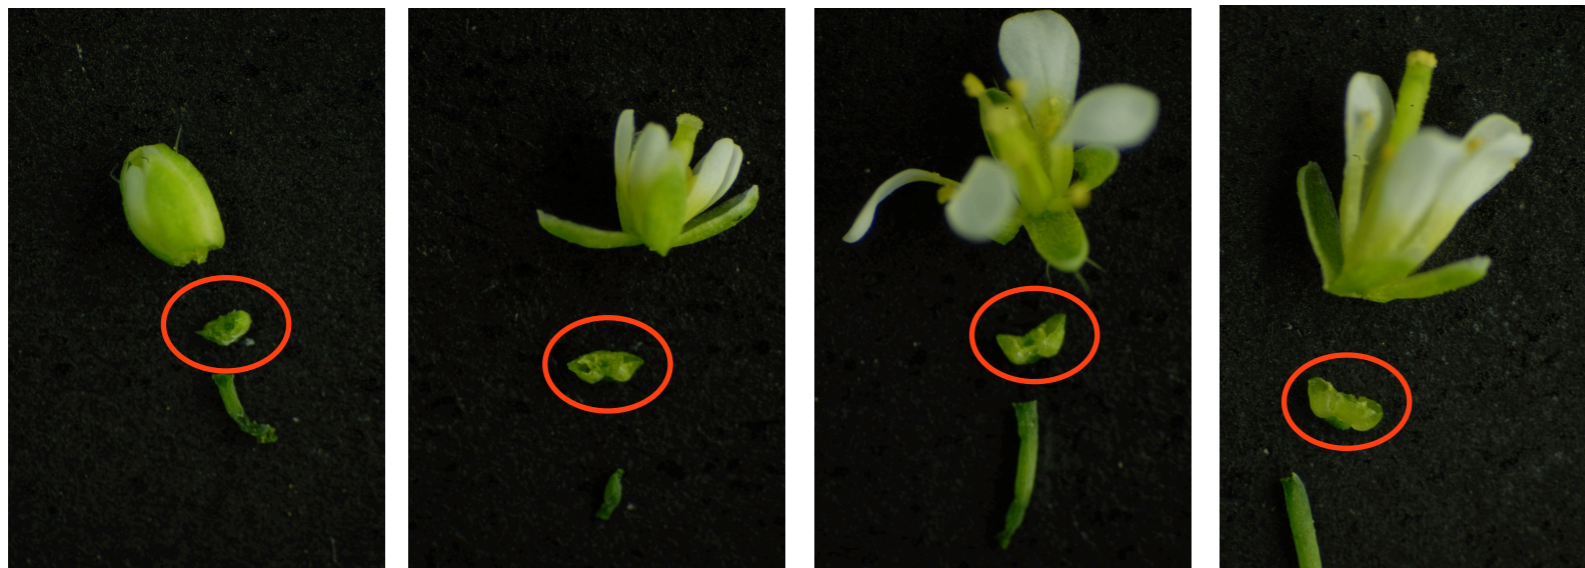

**Dissected flower receptacles**
