# Supplementary material for: Transcriptional profiling of the Arabidopsis abscission mutant hae hsl2 by RNA-Seq
Source: PubMed Central journal article supplement (PMC3566969; doi:10.1186/1471-2164-14-37), 2013-01-17

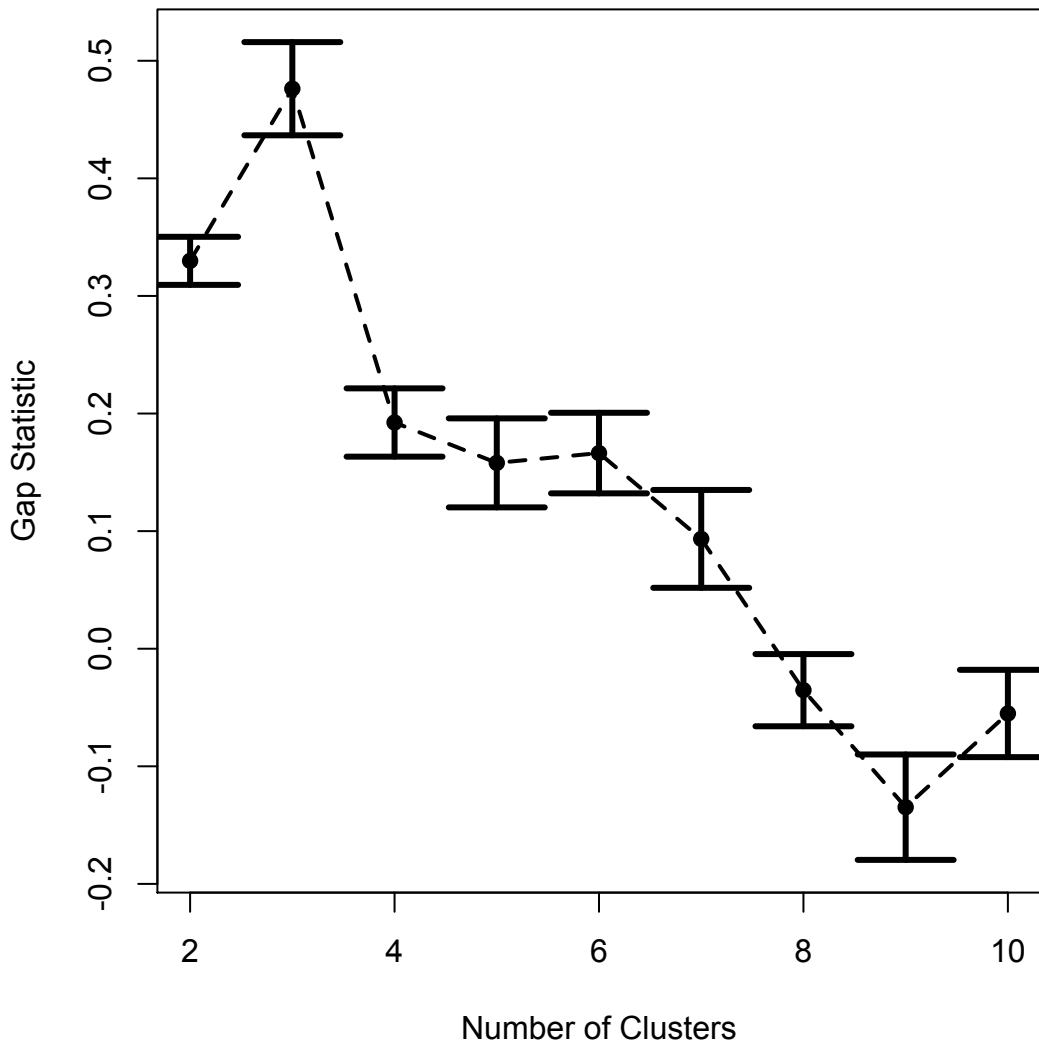

Supplement: 1471-2164-14-37-S5.pdf [file 1471-2164-14-37-S5.pdf]
